# Supplementary material
Source: ML conference proceedings conference paper supplement (https://openreview.net/forum?id=Q2joiIdiAcJ)
Supplement: supplementary_material [file attachment]

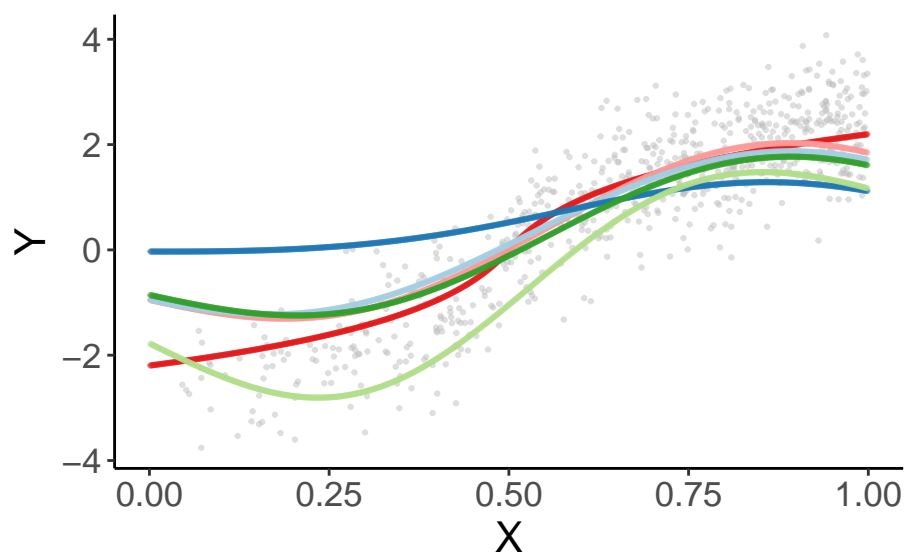

### Method

- Observations
- True Model
- KAR
- KAR.2
- KIV
- KPA
- KReg

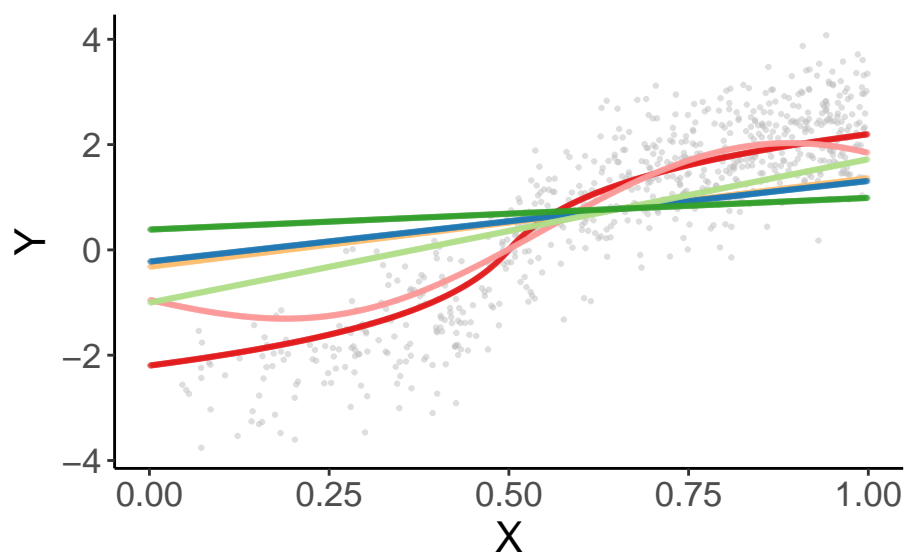

### Method

- Observations
- True Model
- KAR
- AR
- IV
- PA
- OLS
